# Supplementary material
Source: publisher site journal article supplement (http://www.degruyter.com/publication/journal_key/CRPM/downloadAsset/CRPM_Information%20for%20Authors.pdf)
Supplement: Supplementary file 1 [file CRPM_Information%20for%20Authors.pdf]

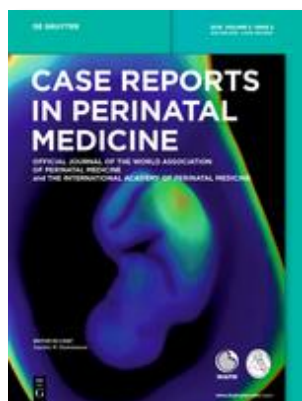

## ***Case Reports in Perinatal Medicine*** **Information for Authors**

1. Scope and general policies of the Journal
2. Ethical conduct of research
3. Submission of manuscripts
4. Preparation of manuscripts
5. Post-acceptance

### **1. Scope and general policies of the Journal**

***Case Reports in Perinatal Medicine (CRPM)*** is published online only and appears in a continuous issue publishing 40 articles per year. The journal provides rapid online publication for all items of articles. CRPM publishes only English-language articles in the following formats:

- Case Report
- Case Series
- Case Report and Review of the Literature

In addition to evidence-based studies, practitioners in clinical practice esteem especially exemplary reports of cases that reveal specific manifestations of diseases, its progress or its treatment. *CRPM* considers case reports and series to be brief reports describing an isolated clinical case or a small number of cases. They may describe new or uncommon diagnoses, unusual outcomes or prognosis, new or infrequently used therapies and side effects of therapy not usually discovered in clinical trials. The potential roles of case reports and case series are:

1. Recognition and description of new diseases
2. Detection of drug side effects (adverse or beneficial)
3. Study of mechanisms of disease
4. Medical education and audit
5. Recognition of rare manifestations of disease

Manuscripts must meet one of the following criteria:

1. Unexpected or unusual presentations or processes of a disease
2. Presentations, diagnoses and/or management of new and emerging diseases
3. An unexpected association between diseases or symptoms
4. An unexpected event in the course of observing or treating a patient
5. Findings that shed new light on the possible pathogenesis of a disease or an adverse effect
6. Unique therapeutic approaches
7. Unreported or unusual side effects or adverse interactions involving medications or treatments

**Peer review** *CRPM* is a double-blind journal. Reviewer names are blinded for authors, and author names are blinded for reviewers. Manuscripts are reviewed anonymously by at least two independent reviewers selected by the Editors.

**Turnaround times** *CRPM* aspires to notify authors about the review decision within 3-4 weeks from submission date. Revised manuscripts should be returned within 6 weeks. Accepted articles are published online within 4 weeks after acceptance.

**Rejection of manuscripts** Manuscripts dealing with subjects that have been well studied in the literature, and that do not resolve questions raised by previous studies, or manuscripts that are statistically underpowered, are likely to be rejected without peer re-view. This applies in particular to studies of genetic associations, which will

be considered only if they contribute new insights and are statistically valid according to generally accepted criteria. Articles which are likely to affect the choice, performance or interpretation of clinical tests will be favored over those which do not, and animal or cell-culture studies need to justify their eligibility. Reporting of negative results must be justified by prior evidence that a positive result would be expected. Manuscripts are also returned to authors if they do not comply with the Information for Authors (e.g., if the number of words allowed for a certain article type will be exceeded).

**Unpublished material** Submission of a manuscript to *CRPM* implies that the work described has not been published previously, except in the form of an abstract, academic thesis or lecture; that it is not under consideration for publication elsewhere; that publication of the work is approved by all authors and tacitly or explicitly by the responsible authorities where the work was carried out; and that, if accepted, it will not be published elsewhere, in English, German, or in any other language, without the written consent of the Publisher.

**Appeals** Manuscripts that have been declined for publication will be reconsidered only at the discretion of the editor(s). Authors who wish to request reconsideration of a previously rejected manuscript must do so in written form with a rebuttal emailed to the journal editorial office. Authors should explain in detail the reasons why they believe the manuscript should be reconsidered. If the rebuttal is accepted, the author will be asked to re-submit. The new manuscript will receive a new ID and submission date and then undergo peer review.

## 2. Ethical conduct of research

For information on plagiarism, please refer to [COPE Committee on Publication Ethics](#). Please note that *CRPM* uses the check program "iThenticate" to assess for potential overlap in prior publication(s). Any previously published material must be referenced appropriately in the manuscript.

**Informed consent** The protection of privacy is a legal right that must not be infringed without individual informed consent. In cases where the identification of personal information is necessary for scientific reasons, authors should obtain full documentation of informed consent, including written permission from the patient or their legal guardians prior to inclusion in the study. The following (or similar) statement should be included in the Materials and methods section: Informed consent was obtained from all individuals included in this study.

**Authorization for the use of human subjects** Manuscripts containing information related to human use should clearly state that the research complies with all relevant national regulations and institutional policies and has been approved by the authors' Institutional Review Board or any equivalent Committee. Copies of the guidelines and policy statements must be available for review by the Managing Editor if necessary. The editors reserve the right to seek additional information or guidance from reviewers on any cases in which concerns arise. All investigations with human subjects must have been conducted by following the tenets of the [Declaration of Helsinki](#), what is more authors must identify the committee or review board approving the experiments, and provide a statement indicating approval of the research. The following (or similar) statement should be included in the Methods section: Ethical approval: The research related to human use has been complied with all the relevant national regulations, institutional policies and in accordance the tenets of the Helsinki Declaration, and has been approved by the authors' institutional review board or equivalent committee.

**Authorization for the use of experimental animals** Manuscripts containing information related to animals use should clearly state that the research has complied with all relevant national regulations and institutional policies and has been approved by the authors' institutional review board or equivalent committee. Copies of the guidelines and policy statements must be available for review by the Managing Editor if necessary. The editors reserve the right to seek additional information or guidance from reviewers on any cases in which concerns arise. The research using animal subjects should be conducted according to the Principles of Laboratory Animal Care and similar documents (e.g. [NIH](#)). For manuscripts reporting experiments on live vertebrates or higher invertebrates, authors must identify the committee approving the experiments, and must confirm that all experiments were performed in accordance with relevant regulations. The following (or similar) statement should be included in the Methods section: Ethical approval: The research related to animals use has been complied with all the relevant national regulations and institutional policies for the care and use of animals.

If the manuscript does not contain any study that requires human or animal ethical approval, the following statement should be included in the Methods section: Ethical approval: The conducted research is not related to either human or animals use.

**Conflict of interest and author contributions** A conflict of interest for a given manuscript exists when a participant in the peer review and publication process – author, reviewer, and editor – has ties to activities that could inappropriately influence his or her judgment, regardless of whether judgment is, in fact, affected. Financial relationships with industry (for example, employment, consultancies, stock ownership, honoraria, expert testimony), either directly or through immediate family, are usually considered the most important conflicts of interest. However, conflicts can occur for other reasons, such as financial support of the study, ties to health insurance, politics or other stakeholders, personal relationships, academic competition, and intellectual passion.

To ensure fair and objective decision-making, authors must declare any associations that pose a conflict of interest (financial, personal or professional) in connection with the manuscript under evaluation. This must be declared during the submission process and also at the end of the manuscript. If you have no declaration to make, please insert *None declared*. The below mentioned statement should be included before the Reference section (or after the Acknowledgments section, if applicable). Authors must also declare responsibility for the entire content of the manuscript and may declare individual contributions of each author, if applicable.

**Acknowledgments: (If applicable).**

**Research funding:** None declared.

**Author contributions:** All authors have accepted responsibility for the entire content of this manuscript and approved its submission.

**Competing interests:** Authors state no conflict of interest.

**Informed consent:** Informed consent was obtained from all individuals included in this study.

**Ethical approval:** Research involving human subjects complied with all relevant national regulations, institutional policies and is in accordance with the tenets of the Helsinki Declaration (as revised in 2013), and has been approved by the authors' Institutional Review Board (xxxx) or equivalent committee. (xxx-Nr.: xx/x).

**OR** Research involving animals complied with all relevant national regulations and institutional policies (xxxx) for the care and use of animals. (xxx-Nr.: xx/x).

**OR** The local Institutional Review Board deemed the study exempt from review.

**Copyright** Manuscripts are accepted on condition of transfer of copyright (for U.S. government employees: to the extent transferable) to the publisher. Once the manuscript has been accepted, it may not be published elsewhere without the consent of the copyright holders.

**Note for authors of NIH-funded research** De Gruyter acknowledges that the author of a US-agency-funded article retains the right to provide a copy of the final manuscript to agency upon acceptance for publication or thereafter, for public archiving in PubMed Central 12 months after publication in *CRPM*. Note that only the accepted author's version of the manuscript, not the PDF file of the published article, may be used for NIH archiving.

### 3. Submission of manuscripts

Please submit manuscripts exclusively online at: <https://mc.manuscriptcentral.com/CRPM>

### 4. Preparation of manuscripts

**Language** Manuscripts should be written in clear and concise English. Please have your text proofread by a native speaker or professional language service before you submit it for consideration. At proof stage, only minor changes other than corrections of printers' errors are allowed.

**Cover letter** Each manuscript should be accompanied by a cover letter containing a brief statement by the authors describing the novelty and importance of their research.

**General format and length** Type the manuscript (including table legends, figure legends and references) double-spaced using 12 pt font size and 1 inch margins. Number all pages. Do not use footnotes in the text, use parentheses instead.

When you submit your work, please ensure the following:

- The manuscript is complete and uploaded correctly. (The HTML version and the PDF file generated from the submitted files must be approved.)
- The title page contains the full title, short title, the full names of all authors (personal name, middle initials, family name), and the full address and the academic title of the corresponding author. The title page should also report the word count, the number of tables and figures, and whether the submission includes any supplemental material.
- All Figures and Tables have been uploaded and appear correctly at the end of the PDF.
- Abstract, Keywords, List of Abbreviations, Tables and Figures, and captions and legends are included.
- Manuscript is spell-checked and within the word limit for the type of article.
- References are in the correct format (Vancouver style) and cited sequentially in the text.
- References mentioned in the reference list are cited in the text and vice versa.
- Ethical approval is obtained and mentioned in the text.
- Numbers in the text, tables, or figures use decimal points, not commas.
- Supplier names, incl. city and country, are provided for reagents and apparatus reported in the manuscript.

#### **General format and length.**

**Word count: title page, abstract, tables, figures, references and supplemental material are excluded.**

**Title:** Should facilitate retrieval with electronic searching.

**Structured abstract (Objectives, Case presentation, Conclusions):** Includes background of the problem; describes the present report and its conclusions (what is the educational message?).

**Introduction:** Describes whether the case is unique. If not, does the case have an unusual diagnosis, prognosis, therapy or course? Describes how the case contributes to scientific knowledge. Describes the instructive or teaching points that add value to this case.

**Case presentation:** Describes the history, examination and pertinent investigations adequately. Is the cause of the patient's illness clear-cut? What are other plausible explanations? Describes the treatments adequately. Have all available therapeutic options been considered? Are outcomes related to treatments?

**Discussion:** Provides a literature review of other similar cases (if available; if not mention as much). Explains the rationale for reporting the case. What is unusual about the case? Describes how the case in question is different to the previously reported ones. Does it challenge prevailing wisdom or existing knowledge? In the future, could things be done differently in a similar case?

**Take-home message of the lessons learnt including (if applicable):** recommendations for patient management, interesting lines of research that could be addressed.

#### **Extension guidelines:**

- Limit on authors: The maximum numbers of authors allowed is 6.
- Limit on words: 4000 for Case Report and 6000 words for Case Series.
- Limit of figures: 4 figures maximum.
- Limit of tables: 2 tables maximum.
- Limit on references: 10 for Case Reports; 20 for Case Series.

**Studies dealing with diagnostic accuracy:** Please refer to the 2015 Standards for Reporting of Diagnostic Accuracy checklist ([STARD](#)).

**Systematic Reviews and Meta-Analyses of randomized controlled trials:** Please refer to the Preferred Reporting Items for Systematic Reviews and Meta-Analyses statement ([PRISMA](#)). Authors must include a suitable PRISMA flow chart in their submission. The flow diagram depicts the flow of information through the different phases of a systematic review. A template of the PRISMA flow diagram is available [here](#) as a PDF and Word document.

**References** Adhere strictly to the reference style of the Journal (Vancouver; recommendations of the "International Committee of Medical Journals Editors"; see [Reference Style](#)). All references mentioned in the Reference list must be mentioned in the text, and vice versa. List and number the references consecutively in the

order that they appear in the text, including Tables and Figures. In the text, identify references by Arabic numerals in [parentheses]. Italic and boldface font type in the Reference section is not allowed. List all authors; if the number is 7 or more, list the first 6 names followed by et al. Identify authors by last name first, followed by up to 2 initials, without periods, indicating the authors' first name. Only the first name of the title is capitalized, as well as proper names within the title. Journal names are abbreviated as indicated in PubMed and in the Web of Knowledge ([NIH.Linkout.Journals](#); [Web of Knowledge](#)), without periods. After the abbreviated journal name, give the year of publication, followed by a semicolon, volume number (but no issue number), followed by a double colon, and the page numbers, with the last page number in shortened format. Meeting abstracts may be cited only if published in journals. Unpublished observations and personal communications are cited only in the text. Correct linking of the references depends on strict adherence to Journal style.

**Refer to the end of this document for detailed examples of references.**

**Tables** Number Tables consecutively using Arabic numerals. Provide a short descriptive title, column headings, and (if necessary) footnotes to make each Table self-explanatory. In the footnote, refer to information within the Table with superscript lowercase letters, and do not use special characters or numbers. Separate units with a comma and use parentheses or square brackets for additional measures (e.g., %, range, etc). Refer to Tables in the text as Table 1, etc. Use Table 1 (boldface), etc. in the title of the Table.

### **Figures**

**General requirements:** All illustrations must be of reproduction-ready quality. They will be reduced in size to fit, whenever possible, the width of a single column. Lettering of all Figures within the article should be uniform in style (preferably a sans serif typeface like Helvetica) and of sufficient size (ca. 10 pt.). Uppercase letters A, B, C, etc. should be used to identify parts of multi-part Figures. In the legend, these letters are included in parentheses. Cite all Figures in the text in numerical order. Indicate the approximate placement of each Figure. Do not embed Figures within the text body of the manuscript.

**Halftone figures and line drawings:** Figures should have a minimum resolution of 300 dpi (halftone figures) and 1200 dpi (line drawings) and be of good contrast. Faint shading may be lost upon reproduction. When drawing bar graphs, use patterning instead of grayscales.

**Color plates:** Authors are encouraged to submit illustrations in color if necessary for the scientific content of their work. Publication of color Figures is provided free of charge both in online and print editions.

**Figure legends:** Provide a short descriptive title and a legend, either below the Figure, in the main text, or on separate pages, to make each Figure self-explanatory. Explain all symbols used in a Figure. Remember to use the same abbreviations as in the text body.

**Videos:** Authors are encouraged to submit videos accompanying the article as Supplemental Material.

**Supplemental material** You may submit Supplemental material, i.e. additional tables, figures, videos, appendices or other additional material (e.g. references) that exceeds the limitation of the article and/or illustrates the contents of your article. Supplemental material should be uploaded as separate file(s) during submission. Within the text, Supplemental material must be cited consecutively and be referred to as Supplemental material (e.g. see Supplemental Material, Figure 1, or Supplemental Figure 1). Supplemental material is subject to peer review as part of the manuscript. If the manuscript is accepted and the Supplemental material is posted online, it will be referenced in the article of the printed version together with the URL where it can be found.

**Nomenclature** Follow the rules of the IUPAC-IUB Commission on Biochemical Nomenclature. Enzyme names should be in accordance with the recommendations of the [IUPAC-IUB Commission on Biochemical Nomenclature](#), 1978, as in Enzyme Nomenclature, published by Academic Press, New York, 1992. Genotypes should be given in italics, phenotypes should not be italicized. Indicate the gene symbol and gene name as approved by the [HUGO Gene Nomenclature Committee](#). Nomenclature of bacterial genetics should follow Demerec et al. Genetics 1966; 54:61–76 ([Demerec et al.](#)).

**Permissions** It is the authors' responsibility to obtain permission to reproduce original or modified material that has been previously published elsewhere.

## **5. Post-acceptance**

**Proofs** The corresponding author of an article will receive the proofs in electronic form to check for editing and type-setting accuracy. Major changes to the article as accepted for publication will not be considered at this stage, unless the authors pay for these changes.

**As per De Gruyter policy, no author list changes are permitted after acceptance of an article. The De Gruyter production team is instructed to enforce this policy during the production/proofing process.**

**Author copy:** The electronic files of typeset articles in Adobe Acrobat PDF format are provided free of charge; corresponding authors receive an e-mail notification that their article has been published online.

**Open Access policy:** If your manuscript is accepted, open access publication is available for authors who wish to make their article freely available on De Gruyter Online. Authors choosing to publish open access pay an article processing charge. All articles undergo peer review and will be accepted for publication based on the quality of their scientific contribution. Choosing open access publication has no influence on the peer review or acceptance process. For more information on De Gruyter's open access policies please visit:

<https://www.degruyter.com/page/open-access>

**Please contact the Editorial Office with any further questions:** Heike Jahnke, T: +49 30 26005-220, E-mail: [CRPM.editorial@degruyter.com](mailto:CRPM.editorial@degruyter.com)

## Vancouver Reference Style

| In-text citation              |                                                                                                                                                                                                                                                                                |
|-------------------------------|--------------------------------------------------------------------------------------------------------------------------------------------------------------------------------------------------------------------------------------------------------------------------------|
| Single reference              | [1]                                                                                                                                                                                                                                                                            |
| Series of references          | [2, 8, 25]                                                                                                                                                                                                                                                                     |
| Range of references           | [5–12]                                                                                                                                                                                                                                                                         |
| Citation order                | Sequential                                                                                                                                                                                                                                                                     |
| Issue numbers                 | Not allowed                                                                                                                                                                                                                                                                    |
| Reference list                |                                                                                                                                                                                                                                                                                |
| Reference type                | Example                                                                                                                                                                                                                                                                        |
| Reference list label          | Numbered without bracket                                                                                                                                                                                                                                                       |
| 1. Journal                    | 1. Raustorp A, Mattsson E, Svensson K, Costa PT Jr. Physical activity, body composition and physical self-esteem: a 3-year follow-up study among adolescents in Sweden. Scand J Med Sci Sports 2006;16:258–66.                                                                 |
| 2. Journal with supplement    | 2. Sallis JF, Saelens BE. Assessment of physical activity by self-report: status, limitations, and future directions. Res Q Exerc Sport 2000;71(2 Suppl):S1–14.                                                                                                                |
| 3. Collaboration              | 3. WHO. The diagnosis and management of non-alcoholic fatty liver disease: practice guideline by the American Association for the Study of Liver Diseases, American College of Gastroenterology, and the American Gastroenterological Association. Hepatology 2012;55:2005–23. |
| 4. et al. usage (more than 6) | 4. Kaye K, Day RD, Hair EC, Moore KA, Hadley AM, Teixeira PJ, et al. Parent marital quality and the parent-adolescent relationship: effects                                                                                                                                    |

|                                                |                                                                                                                                                                                                                                                                                                                                                                                       |
|------------------------------------------------|---------------------------------------------------------------------------------------------------------------------------------------------------------------------------------------------------------------------------------------------------------------------------------------------------------------------------------------------------------------------------------------|
| authors = 6 authors + et al.)                  | on sexual activity among adolescents and youth. Marriage Fam Rev 2009;45:270–88.                                                                                                                                                                                                                                                                                                      |
| 5. Epub ahead of print                         | 5. Mason EB, Burkhart K, Lazebnik R. Adolescent stress management in a primary care clinic. J Pediatr Health Care 2018 Sep 3. DOI: 10.1016/j.pedhc.2018.08.001 [Epub ahead of print].                                                                                                                                                                                                 |
| 6. Journal – in press                          | 6. Tappy L, Lara KA. Metabolic effects of fructose and the worldwide increase in obesity. Physiol Rev, in press.                                                                                                                                                                                                                                                                      |
| 7. Book/monograph                              | 7. Shek DTL, Sun RCF, Merrick J. University and college students. Health and development issues for the leaders of tomorrow. New York: Nova Science; 2013.                                                                                                                                                                                                                            |
| 8. Book with edition                           | 8. Joannopoulos JD, Johnson SG, Winn JN, Meade RD. Photonic crystals: molding the flow of light, 2nd ed. Princeton, NJ: Princeton University Press; 2008:350 p.                                                                                                                                                                                                                       |
| 9. Edited book                                 | 9. Shek DTL, Ma C, Yu L, Merrick J, editors. Human developmental research. Experience from research in Hong Kong. New York: Nova Science; 2014.                                                                                                                                                                                                                                       |
| 10. Edited book with chapter title and editors | 10. Halpen-Felsher BL, Morrell HE. Preventing and reducing tobacco use. In: Berlan ED, Bravender T, editors. Adolescent medicine today: a guide to caring for the adolescent patient [Internet]. Singapore: World Scientific Publishing Co.; 2012.                                                                                                                                    |
| 11. Edited book series                         | 11. Forghieri F, Tkach RW, Chraplyvy AR. Optical fiber telecommunications, Kaminov IP, Koch TL, editors. San Diego, CA: Academic; 1997, vol IIIA.                                                                                                                                                                                                                                     |
| 12. Proceedings/Conferences                    | 12. Musaka K, Akasaka Y, Suzuki Y, Kamiya T. Novel network fiber to manage dispersion at 1.55 $\mu\text{m}$ with combination of 1.3 $\mu\text{m}$ zero dispersion single mode fiber. In: Proceedings of the symposium on robotics, mechatronics and animatronics in the creative and entertainment industries and arts. SSAISB 2005. University of Hertfordshire, Hatfield, UK; 2005. |



|                                                 |                                                                                                                                                                                                                                                                                                                             |
|-------------------------------------------------|-----------------------------------------------------------------------------------------------------------------------------------------------------------------------------------------------------------------------------------------------------------------------------------------------------------------------------|
| 13. Electronic publications<br>(Available from) | 13. IASO. Epidemiology of childhood overweight & obesity in India: a systematic review. International Association for the Study of Obesity; 2012. Available from:<br><a href="http://www.iaso.org/iotf/obesity/obesitytheglobalepidemic">http://www.iaso.org/iotf/obesity/obesitytheglobalepidemic</a>                      |
| 14. Electronic publications<br>(Accessed)       | 14. IPAQ Group. Guidelines for data processing and analysis of the international physical activity questionnaire (IPAQ) – short and long forms [Online]. Available from: <a href="https://sites.google.com/site/theipaq/scoring-protocol">https://sites.google.com/site/theipaq/scoring-protocol</a> [Accessed 4 Apr 2013]. |
| 15. Thesis/Dissertation                         | 15. Cotruvo, J. Kinetic model for chlorophyll degradation [Ph.D. thesis]. Cambridge, MA: Massachusetts Institute of Technology; 1996.                                                                                                                                                                                       |
| 16. Report                                      | 16. Rowe IL, Carson NE. Medical manpower in Victoria. East Bentleigh (AU): Monash University, Department of Community Practice; 1981. 35 p., Report No. 4.                                                                                                                                                                  |
| 17. Patent                                      | 17. Pagedas AC. Flexible endoscopic grasping and cutting device and positioning tool assembly. United States patent 20020103498, 2002.                                                                                                                                                                                      |
| 18. Standards                                   | 18. Frequency response and bias, NERC Reliability Standard BAL-003-0.1b, May 2009 [Online]. Available from:<br><a href="http://www.nerc.com/files/BAL-003-0_1b.pdf">http://www.nerc.com/files/BAL-003-0_1b.pdf</a>                                                                                                          |
